# Supplementary material for: Long non-coding RNA MALAT1 increases AKAP-9 expression by promoting SRPK1-catalyzed SRSF1 phosphorylation in colorectal cancer cells
Source: PubMed Central journal article supplement (PMC4905507; doi:10.18632/oncotarget.7367), 2016-02-13
Supplement: oncotarget-07-11733-s001.pdf [file oncotarget-07-11733-s001.pdf]

## Long non-coding RNA MALAT1 increases AKAP-9 expression by promoting SRPK1-catalyzed SRSF1 phosphorylation in colorectal cancer cells

### Supplementary Materials

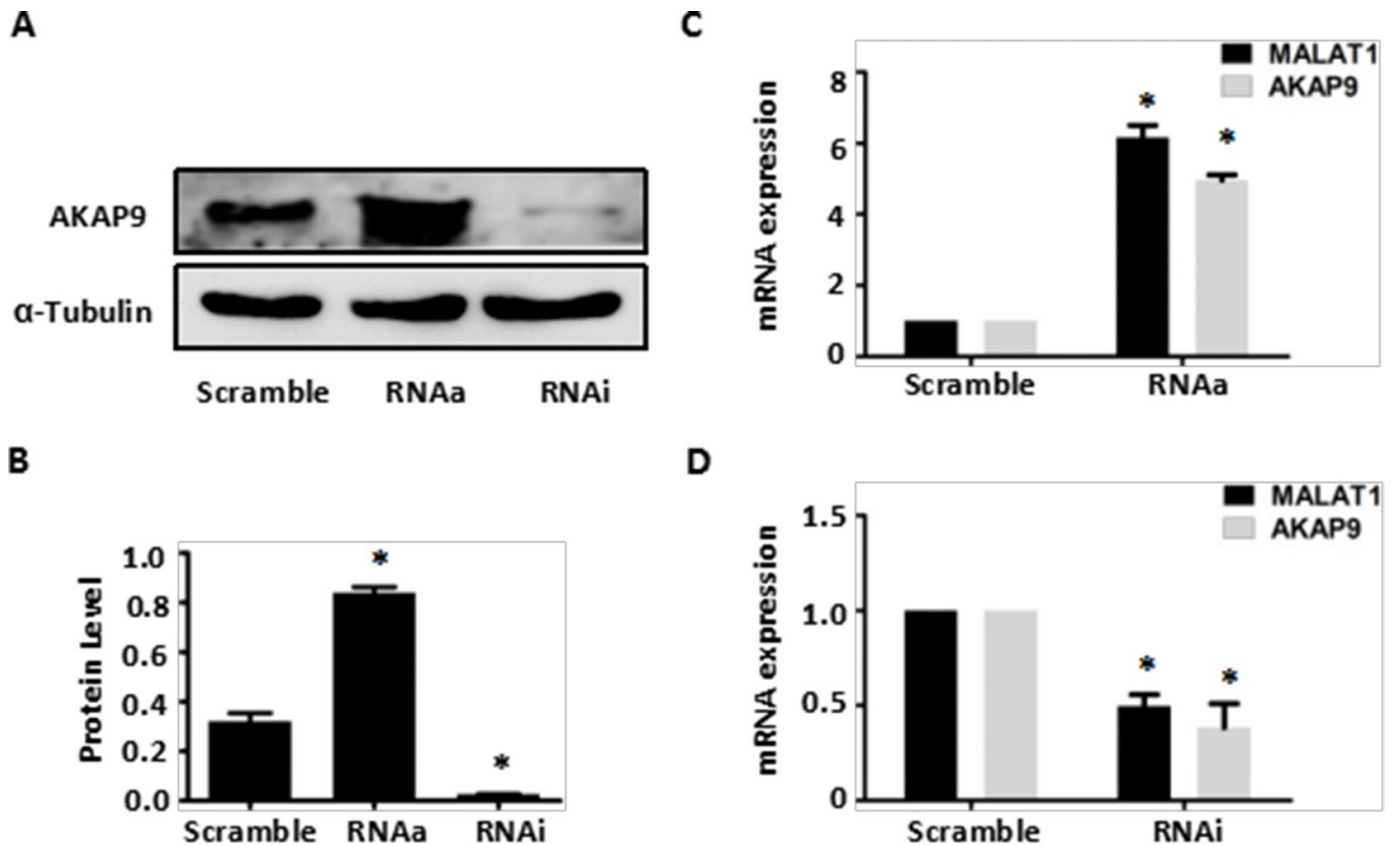

**Supplementary Figure S1: Long non-coding RNA MALAT1 regulated AKAP-9 expression in CRC SW480 cells.** (A) Western blot analysis of AKAP-9 protein expression in SW480 cells with stably activated/down-expressing MALAT1 (RNAa/RNAi) or scramble. (B) The protein levels were normalized to  $\alpha$ -Tubulin.  $*P < 0.001$  compared to the control group (scramble),  $n = 3$ . (C-D) AKAP-9 mRNA expression were detected by qPCR.  $*P < 0.01$  compared to the control group (scramble),  $n = 3$ .

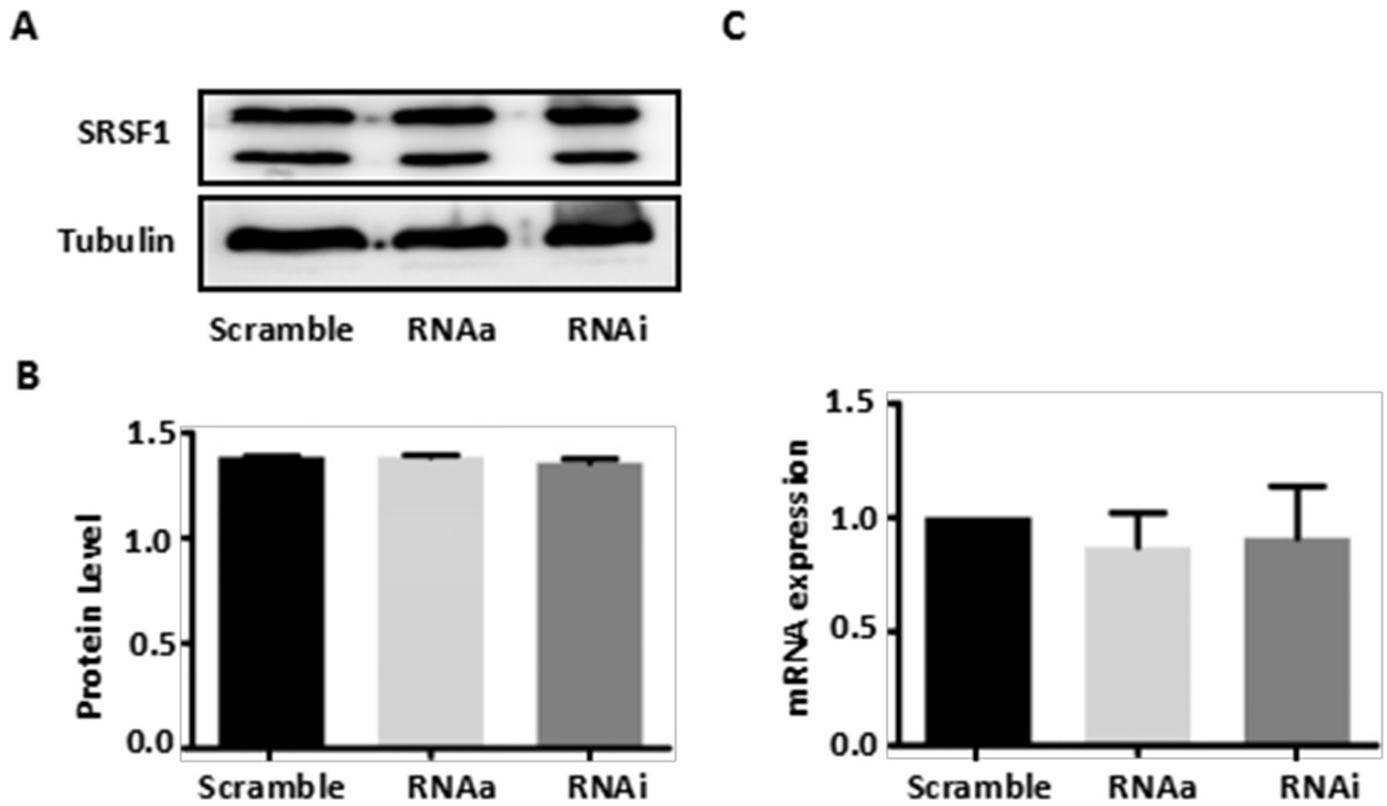

**Supplementary Figure S2: Long non-coding RNA MALAT1 did not regulate SRSF1 protein expression in CRC SW480 cell.** (A) Western blot analysis of SRSF1 protein expression in SW480 cells with stably activated/down-expressing MALAT1 (RNAa/RNAi) or scramble. (B) The protein levels were normalized to  $\alpha$ -Tubulin,  $n = 3$ . (C) SRSF1 mRNA expression were detected by qPCR,  $n = 3$ .
